# Supplementary material for: Exploration of the forbidden regions of the Ramachandran plot (ϕ-ψ) with QTAIM
Source: Royal Society of Chemistry journal article supplement (doi:10.1039/c7cp05124g), 2017-01-01
Supplement: c7cp05124g1.pdf [file c7cp05124g1.pdf]

## ELECTRONIC SUPPLEMENTARY INFORMATION

### Exploration of the Forbidden Regions of the Ramachandran Plot ( $\phi$ - $\psi$ ) with QTAIM

Roya Momen<sup>1</sup>, Alireza Azizi<sup>1</sup>, Lingling Wang<sup>1</sup>, Yang Ping<sup>1</sup>, Tianlv Xu<sup>1</sup>, Steven R. Kirk<sup>\*1</sup> Wenxuan Li<sup>2</sup>,

Sergei Manzhos<sup>2</sup> and Samantha Jenkins<sup>\*1</sup>

<sup>1</sup>Key Laboratory of Chemical Biology and Traditional Chinese Medicine Research and Key Laboratory of Resource Fine-Processing and Advanced Materials of Hunan Province of MOE, College of Chemistry and Chemical Engineering, Hunan Normal University, Changsha, Hunan 410081, China

<sup>2</sup>Department of Mechanical Engineering, National University of Singapore, Block EA 07-08, 9 Engineering Drive 1, Singapore 117576

\*email: samanthajsuman@gmail.com

\*email: steven.kirk@cantab.net

#### Contents:

- 1. Supplementary Materials S1.** The Ramachandran plots ( $\phi$ - $\psi$ ) for twenty-nine conformers of the magainin-2 peptide.
- 2. Supplementary Materials S2.** The ball and stick renderings of the twenty-nine conformers of the magainin-2 peptide.
- 3. Supplementary Materials S3.** The relative energy  $\Delta E$  for the molecular graphs of the twenty-nine conformers of magainin-2 peptide.
- 4. Supplementary Materials S4.** Plots of the response  $\beta^*_\phi$ ,  $\beta_\phi$  versus  $\beta^*_\psi$ ,  $\beta_\psi$  of the backbone shared-shell *BCPs* including the Ramachandran plot ( $\phi$ - $\psi$ ) regions for the complete set of magainin-2 peptide molecular graphs.
- 5. Supplementary Materials S5.** Plots of the response  $\beta^*_\psi$ ,  $\beta_\psi$  versus  $\psi$  of the backbone shared-shell *BCPs* including the Ramachandran plot ( $\phi$ - $\psi$ ) regions for the complete set of magainin-2 peptide molecular graphs.
- 6 Supplementary Materials S6.** Plots of  $\phi$  versus the response  $\beta^*_\phi$ ,  $\beta_\phi$  of the backbone shared-shell *BCPs* including the Ramachandran plot ( $\phi$ - $\psi$ ) regions for the complete set of magainin-2 peptide molecular graphs.
- 7. Supplementary Materials S7.** Plots of  $\phi$  versus the response  $\beta^*_\psi$ ,  $\beta_\psi$  of the backbone shared-shell *BCPs* including the Ramachandran plot ( $\phi$ - $\psi$ ) regions for the complete set of magainin-2 peptide molecular graphs.
- 8. Supplementary Materials S8.** Plots of the response  $\beta^*_\phi$ ,  $\beta_\phi$  versus  $\psi$  of the backbone shared-shell *BCPs* including the Ramachandran plot ( $\phi$ - $\psi$ ) regions for the complete set of magainin-2 peptide molecular graphs.

# 1. Supplementary Materials S1.

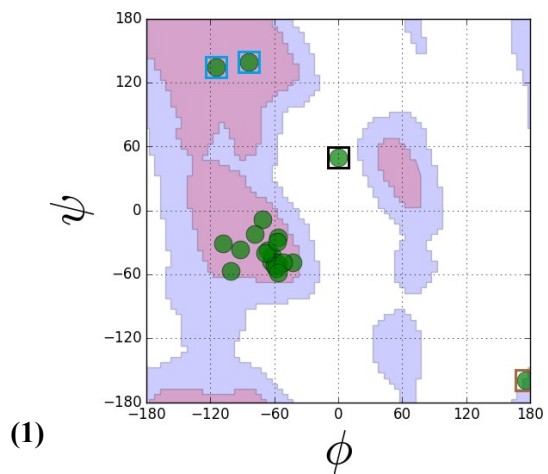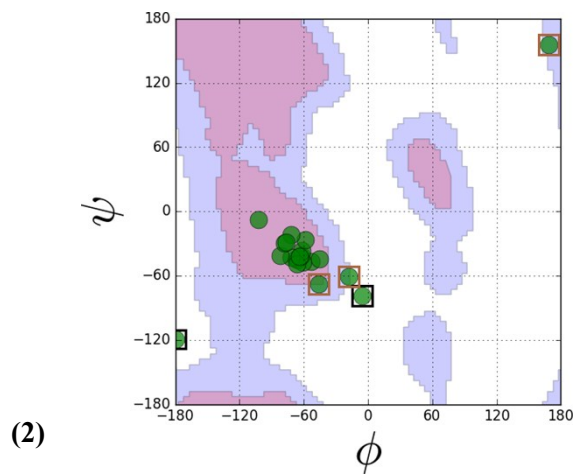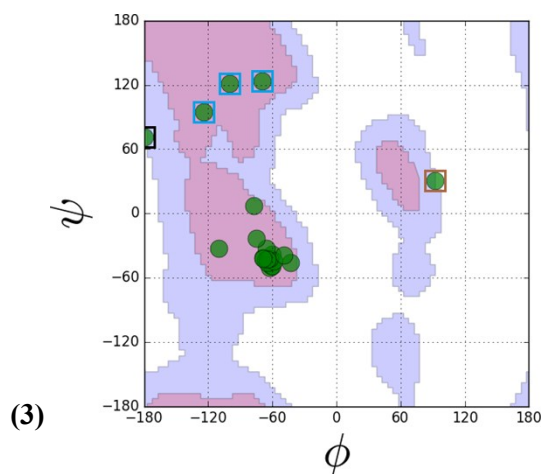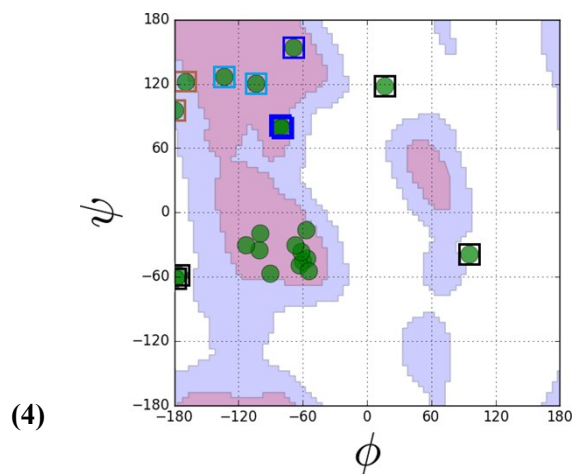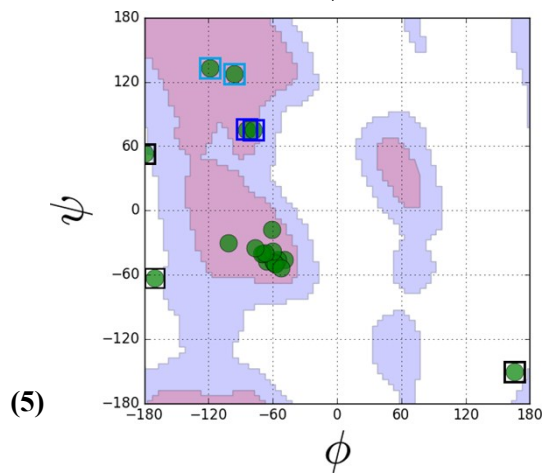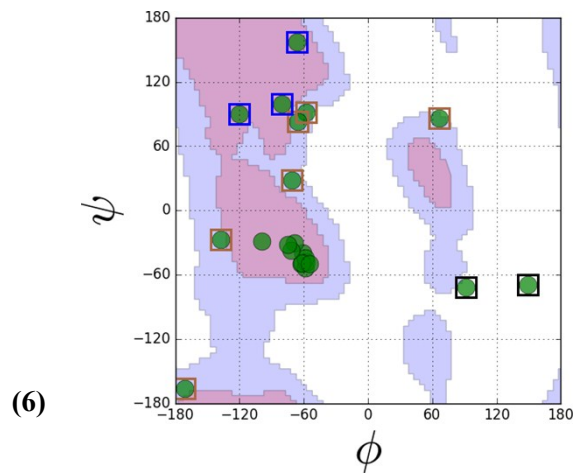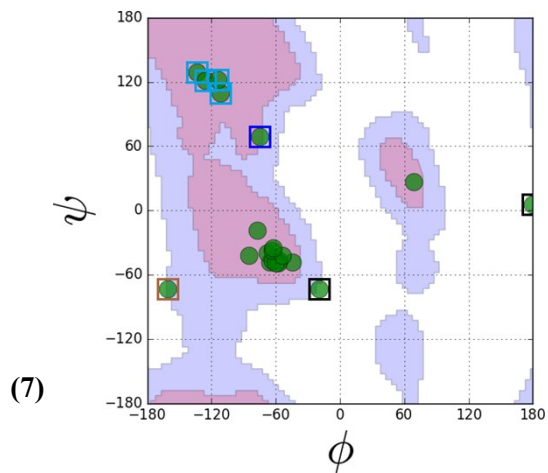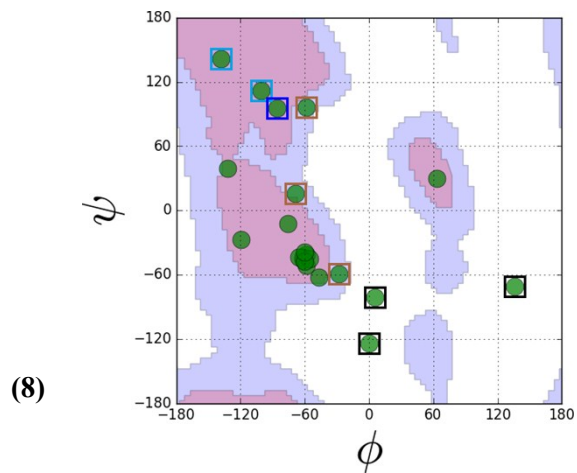

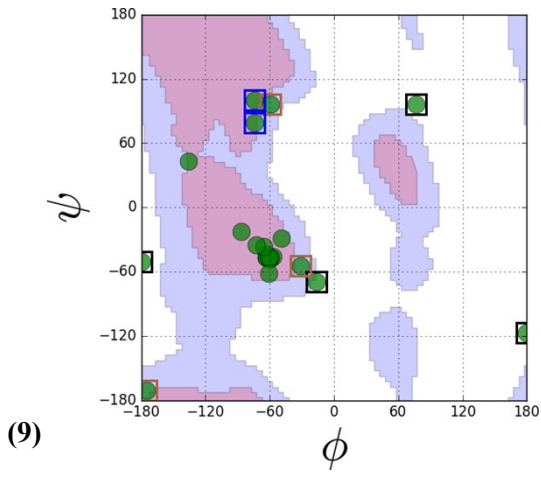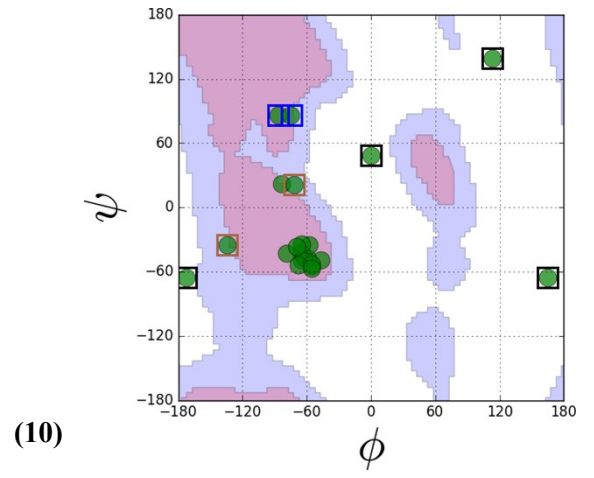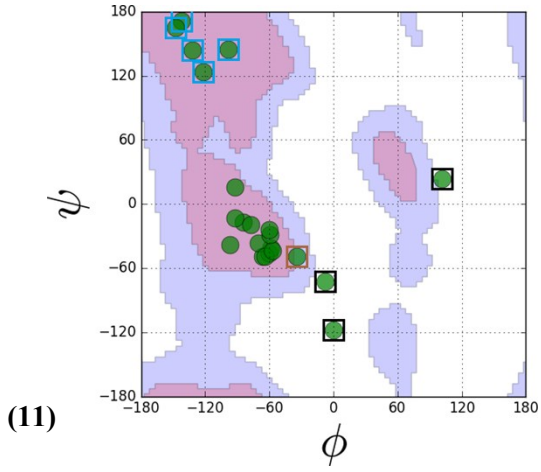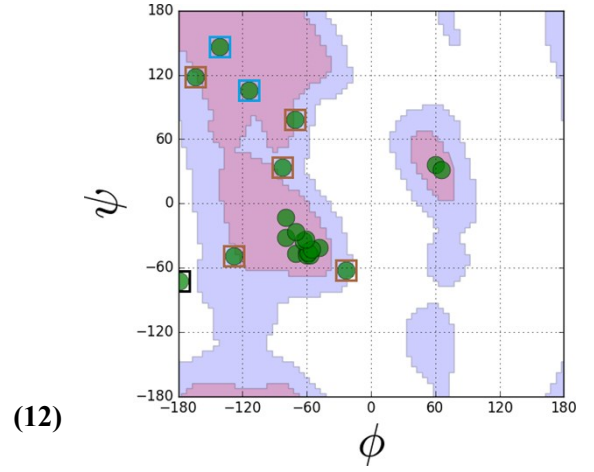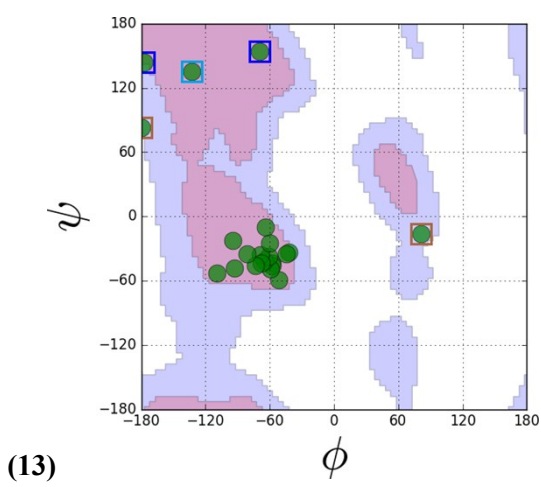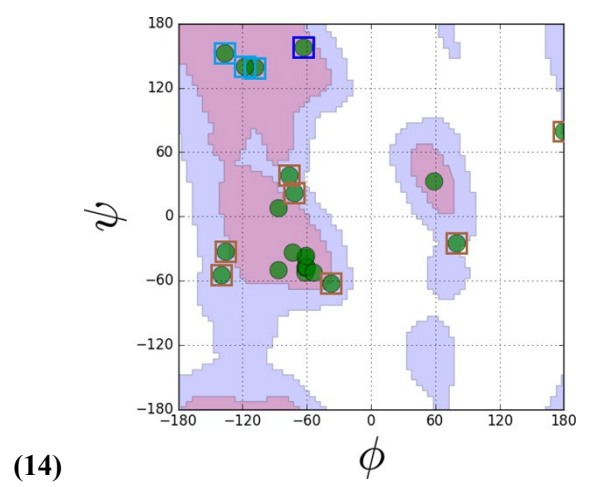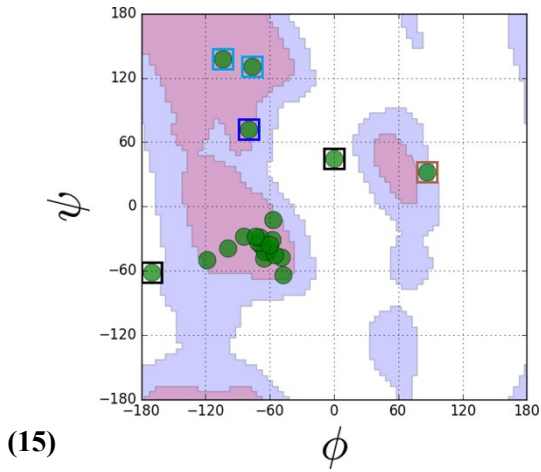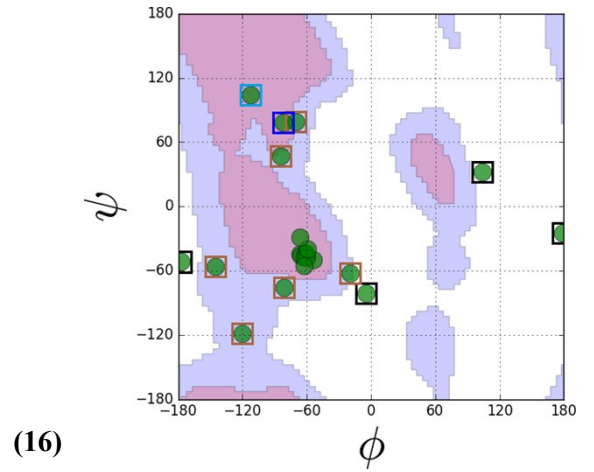

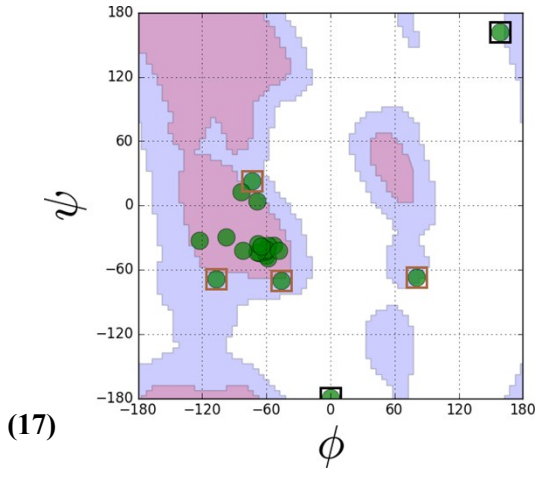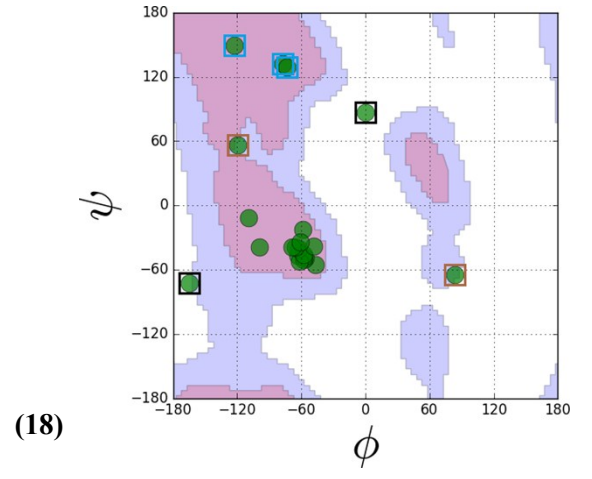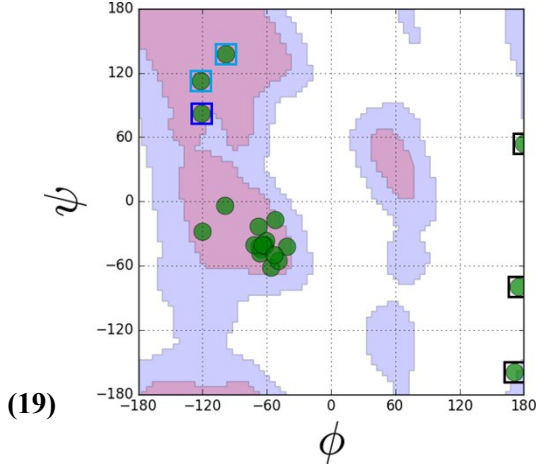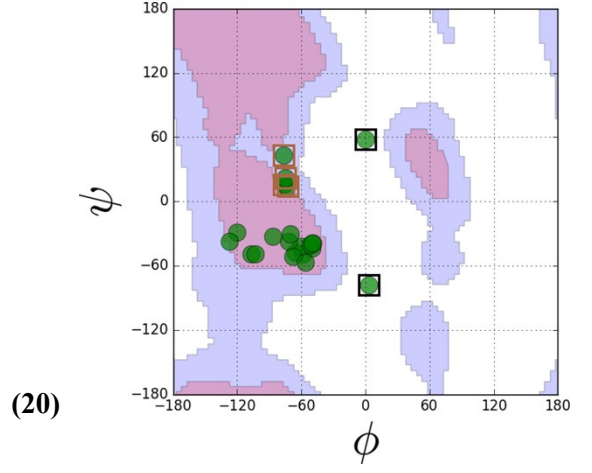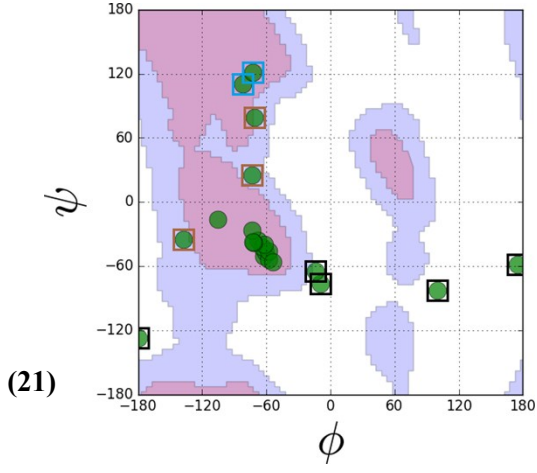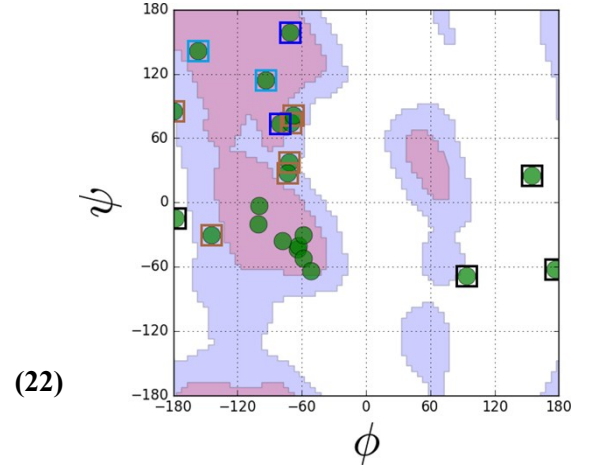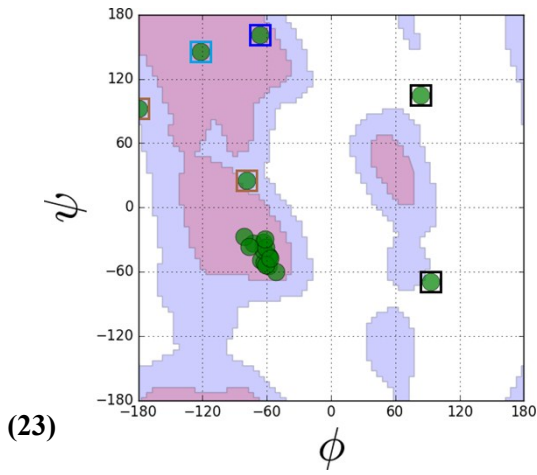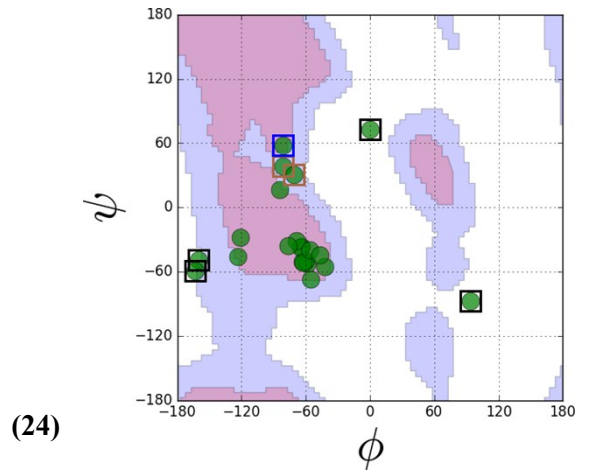

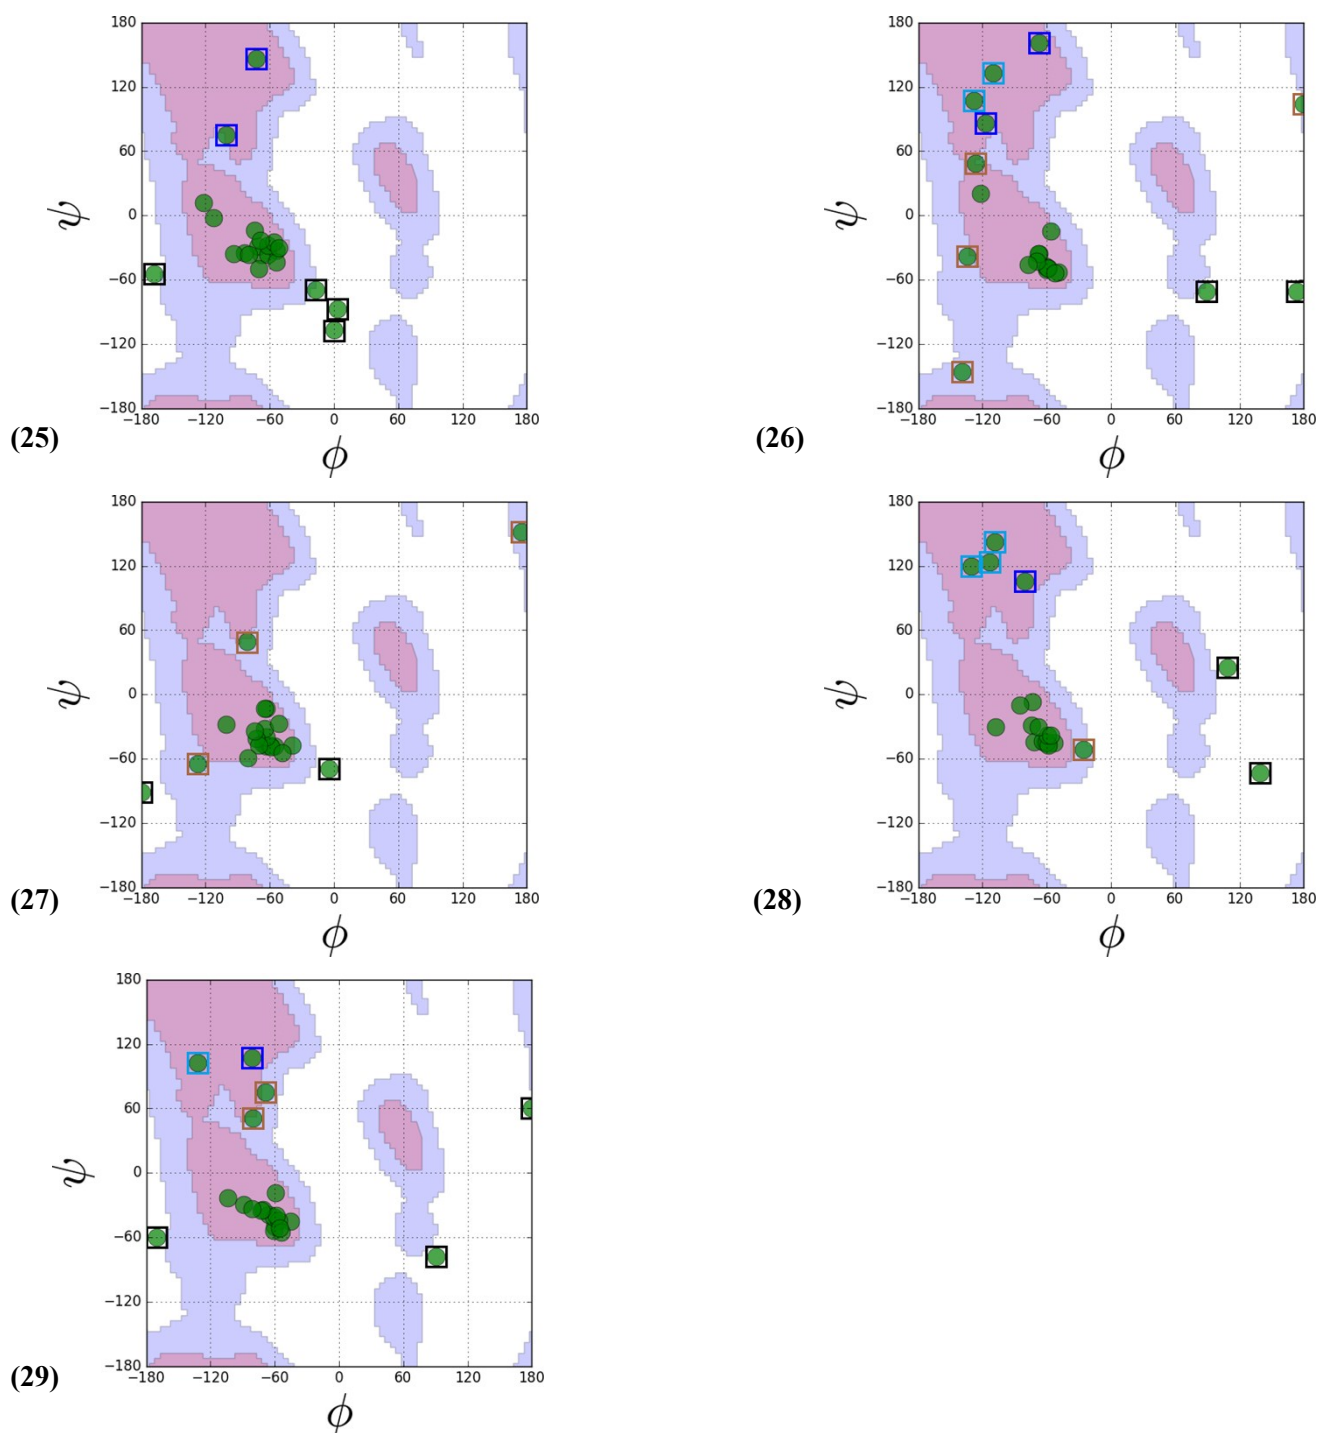

**Figure S1.** The Ramachandran plots ( $\phi$ - $\psi$ ) for twenty nine conformers of the magainin-2 peptide with the amino acid sequence GIGKWLHS AKKFGKAFVGEIMNS. The data points corresponding to the backbone in the magainin-2 peptide backbone are represented by the green circles. The magenta, blue and white regions correspond to the 'favored', 'allowed' and 'forbidden' regions respectively. The black, brown, pale blue and dark blue squares are indicating the 'forbidden', 'allowed', 'beta-sheet' and regions close to beta-sheet character in the conventional Ramachandran plot ( $\phi$ - $\psi$ ) respectively.

## 2. Supplementary Materials S2.

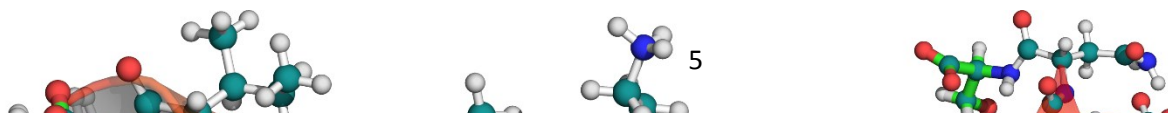

**(1)**

**(2)**

**(3)**

**(4)**

**(5)**

**(6)**

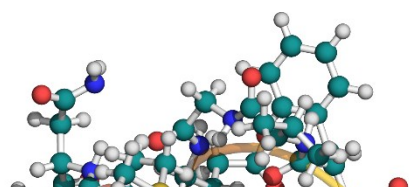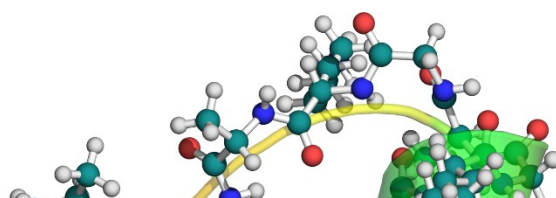

(7)

(8)

(9)

(10)

(11)

(12)

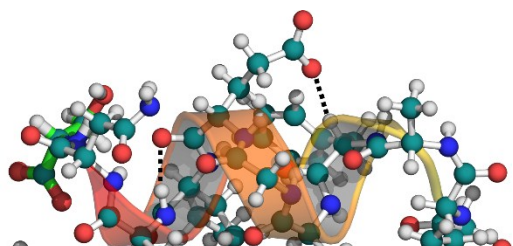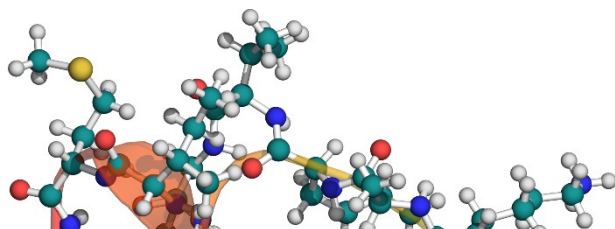



(13)

(14)

(15)

(16)

(17)

(18)

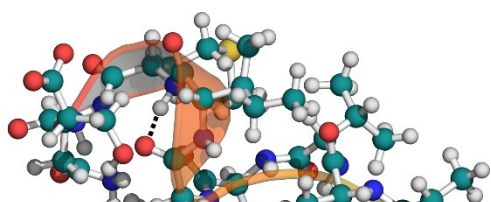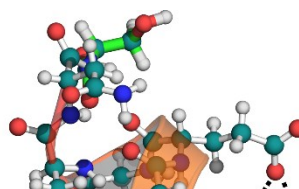



(19)

(20)

(21)

(22)

(23)

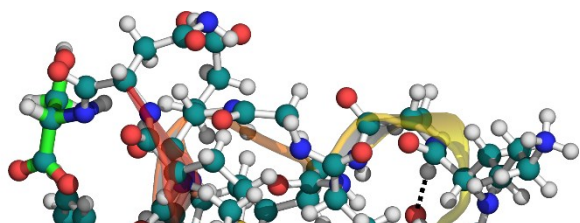

(24)

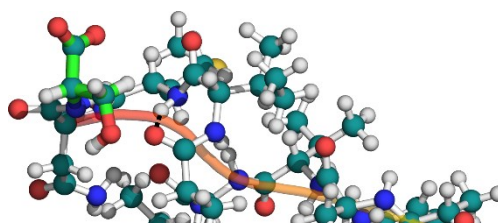

(25)

(26)

(27)

(28)

(29)

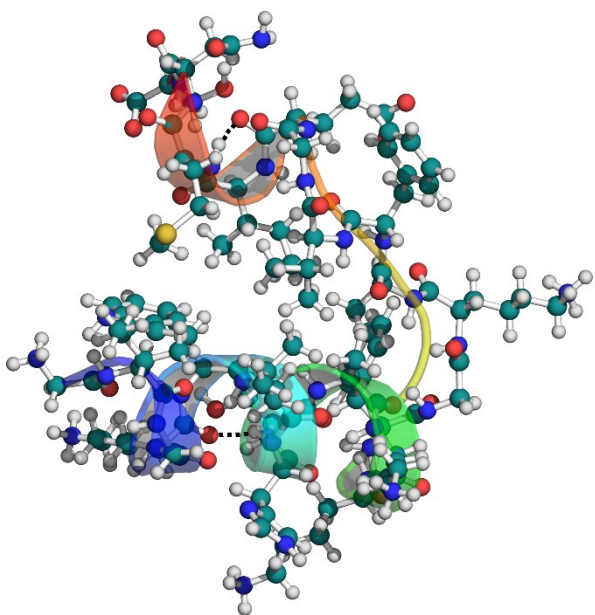

**Figure S2.** The ball and stick renderings of the magainin-01 to magainin-29 conformers are presented in sub-figures **(1-29)** respectively. The carbon, hydrogen, oxygen, nitrogen and sulphur atoms are indicated by the green, white, red, blue and yellow spheres respectively. The colored ribbon is superimposed on the structures to represent the  $\alpha$ -helix with blue and red representing the start and termination of the GIGKWLHSAKKFGKAFVGEIMNS amino acid sequence. Hydrogen bond *BCP* bond-paths possessing a degree of covalent character, that is total local energy density  $H(\mathbf{r}_b) < 0$  are indicated by the thick black dashed lines.

### 3. Supplementary Materials S3.

**Table S3.** The solution sets of the Poincaré-Hopf relation ( $n = 361$ ), where  $b$ ,  $r$  and  $c$  represent the numbers of  $BCPs$ ,  $RCPs$  and  $CCPs$ , see equation (1) of the main text, the topological complexity  $\Sigma_{brc}$  and relative energy  $\Delta E$  for the molecular graphs of the twenty-nine conformers of magainin-2. The  $\alpha$ -helix structure magainin-2 peptide with the twenty-three amino acid sequence GIGKWLHSAKKFGKAFVGEIMNS.

| Molecular graph | $b$ | $r$ | $c$ | $\Sigma_{brc}$ | $\Delta E(\text{au})$ |
|-----------------|-----|-----|-----|----------------|-----------------------|
| magainin-06     | 478 | 145 | 27  | 650            | 0.0000                |
| magainin-18     | 474 | 145 | 31  | 650            | 0.0150                |
| magainin-28     | 473 | 148 | 35  | 656            | 0.0206                |
| magainin-03     | 473 | 149 | 36  | 658            | 0.0268                |
| magainin-12     | 473 | 141 | 28  | 642            | 0.0371                |
| magainin-07     | 462 | 136 | 34  | 632            | 0.0575                |
| magainin-15     | 479 | 148 | 29  | 656            | 0.0580                |
| magainin-16     | 477 | 155 | 38  | 670            | 0.0665                |
| magainin-26     | 453 | 115 | 22  | 590            | 0.0920                |
| magainin-23     | 476 | 149 | 33  | 658            | 0.1178                |
| magainin-13     | 481 | 152 | 31  | 664            | 0.1264                |
| magainin-09     | 480 | 153 | 33  | 666            | 0.1345                |
| magainin-19     | 472 | 142 | 30  | 644            | 0.1459                |
| magainin-08     | 459 | 122 | 23  | 604            | 0.1513                |
| magainin-14     | 469 | 144 | 35  | 648            | 0.1594                |
| magainin-24     | 467 | 133 | 26  | 626            | 0.1605                |
| magainin-04     | 459 | 118 | 19  | 596            | 0.1644                |
| magainin-20     | 451 | 111 | 20  | 582            | 0.1821                |
| magainin-11     | 474 | 145 | 31  | 650            | 0.1859                |
| magainin-27     | 470 | 141 | 31  | 642            | 0.1886                |
| magainin-29     | 469 | 137 | 28  | 634            | 0.1960                |
| magainin-10     | 466 | 138 | 32  | 636            | 0.1981                |
| magainin-01     | 473 | 148 | 35  | 656            | 0.1987                |
| magainin-21     | 465 | 133 | 28  | 626            | 0.2008                |
| magainin-22     | 459 | 118 | 19  | 596            | 0.2134                |
| magainin-17     | 469 | 140 | 31  | 640            | 0.2165                |
| magainin-02     | 469 | 146 | 37  | 652            | 0.2251                |
| magainin-25     | 463 | 123 | 20  | 606            | 0.2343                |
| magainin-05     | 464 | 132 | 28  | 624            | 0.2807                |

4. Supplementary Materials S4.

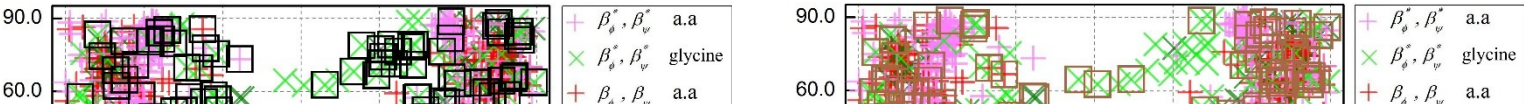

(a)

(b)

(c)

**Figure 4.** QTAIM interpreted Ramachandran plots  $\{(\beta_\phi, \beta_\phi^*), (\beta_\psi, \beta_\psi^*)\}$  of the backbone shared-shell *BCPs* for the complete set of magainin-2 peptide molecular graphs are presented in sub-figure (a-c). When the nomenclature (x-y) is used the ‘-’ is to be interpreted as a hyphen and not a subtraction sign, the ‘,’ is to be interpreted as indicating that the bracketed quantities are superimposed onto the same axes. The pale green crosses indicate the  $\beta_\phi^*$  and  $\beta_\psi^*$  (the least preferred responses), the dark green crosses represent the  $\beta_\phi$  and  $\beta_\psi$  (the most preferred responses) for the glycine amino acid *BCPs*. The corresponding quantities for the remaining amino acids are given by the pink ( $\beta_\phi^*$  and  $\beta_\psi^*$ ) and red ( $\beta_\phi$  and  $\beta_\psi$ ) pluses respectively in the magainin-2 peptide structure. In sub-figure (b) we superimpose on the  $\{(\beta_\phi, \beta_\phi^*), (\beta_\psi, \beta_\psi^*)\}$  plot the black (sub-figure (a)), brown (sub-figure (b)), pale blue and dark blue squares (sub-figure (c)) that indicate the ‘forbidden’, ‘allowed’, ‘beta sheet’ inside of the ‘allowed’ region but close to beta-sheet region from the conventional Ramachandran plot ( $\phi$ - $\psi$ ) respectively.

## 5. Supplementary Materials S5.

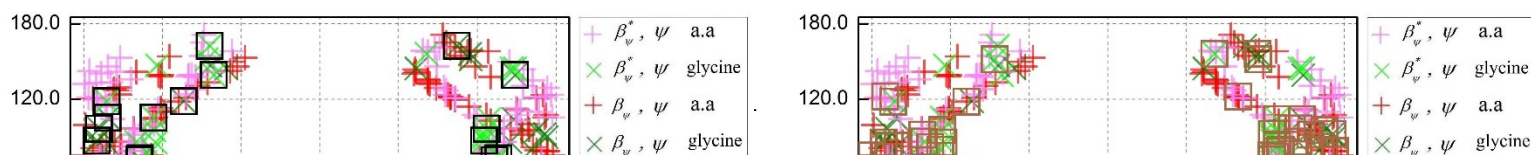

(a)

(b)

(c)

**Figure S5.** Plots of  $\beta_{\psi}^*$ ,  $\beta_{\psi}$  versus  $\psi$  of the backbone shared-shell *BCPs* for the complete set of 29 magainin-2 peptide molecular graphs are presented in sub-figures (a-c). See the figure caption of **Figure S4** for further details.

## 6. Supplementary Materials S6.

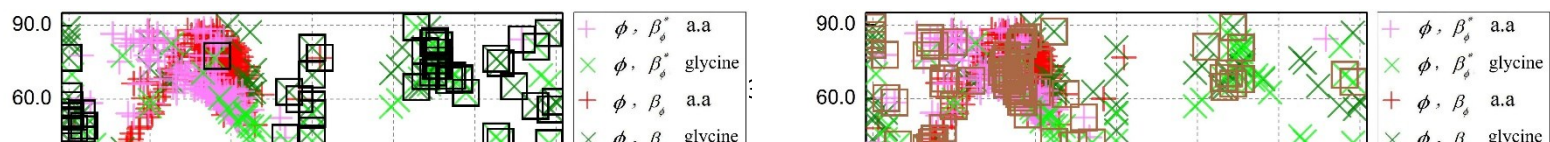

(a)

(b)

(c)

**Figure S6.** Plots of  $\phi$  versus response  $\beta_\phi^*$ ,  $\beta_\phi$  of the backbone shared-shell *BCPs* for the complete set of 29 magainin-2 peptide molecular graphs are presented in sub-figures (a-c). See the figure caption of **Figure S4** for further details.

## 7. Supplementary Materials S7

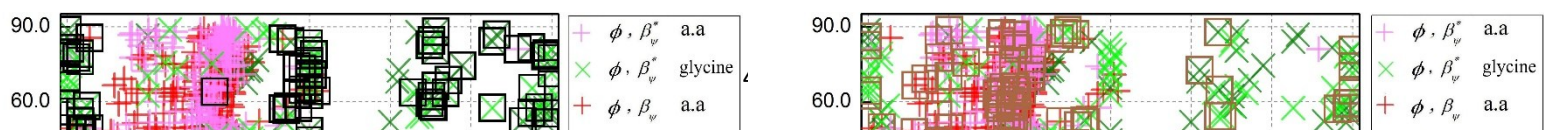

(a)

(b)

(c)

**Figure S7.** Plots of  $\phi$  versus the response  $\beta^*_{\psi}$ ,  $\beta_{\psi}$  of the backbone shared-shell *BCPs* for the complete set of 29 magainin-2 peptide molecular graphs are presented in sub-figures (a-c). See the figure caption of **Figure S4** for further details.

## 8. Supplementary Materials S8.

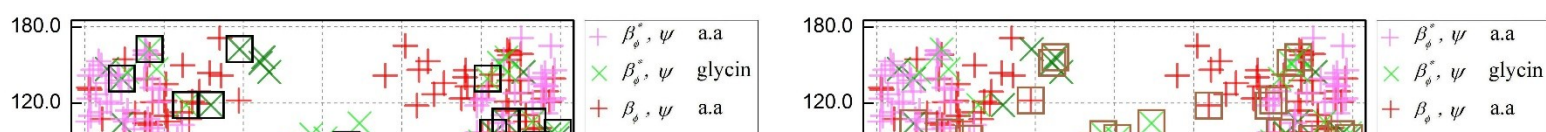



(a)

(b)

(c)

**Figure S8.** Plots of  $\psi$  versus the response  $\beta_\phi^*$ ,  $\beta_\phi$  versus  $\psi$  of the backbone shared-shell *BCPs* for the complete set of 29 magainin-2 peptide molecular graphs are presented in sub-figures **(a-c)**. See the figure caption of **Figure S4** for further details.
